# Supplementary material for: Development of a Serum-Free Medium To Aid Large-Scale Production of Mycoplasma-Based Therapies
Source: PubMed Central journal article supplement (PMC10269708; doi:10.1128/spectrum.04859-22), 2023-04-25
Supplement: spectrum.04859-22-s0001.pdf [file spectrum.04859-22-s0001.pdf]

## SUPPLEMENTARY FIGURES AND TABLES

Figure S1

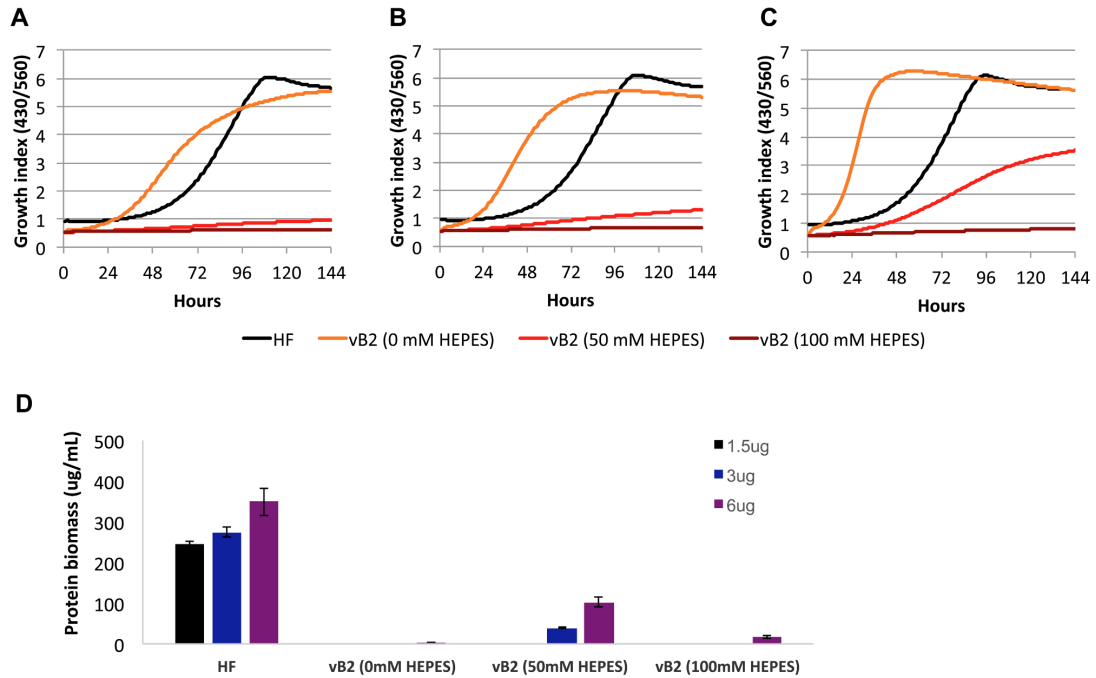

**Fig S1. Buffering system optimization for the medium screening.**

Growth curve analysis determined by the 430/560 absorbance ratio index method comparing the performance of Hayflick rich medium (HF) and vB2 containing 0mM, 50mM and 100mM HEPES. Cultures were initiated with 1.5μg (A), 3μg (B) or 6μg (C) of starting inocula. (D) Protein biomass yields at the end of the growth curves shown in panels A, B and C. Data represents the mean ± standard error of three biological replicates.

**Figure S2**

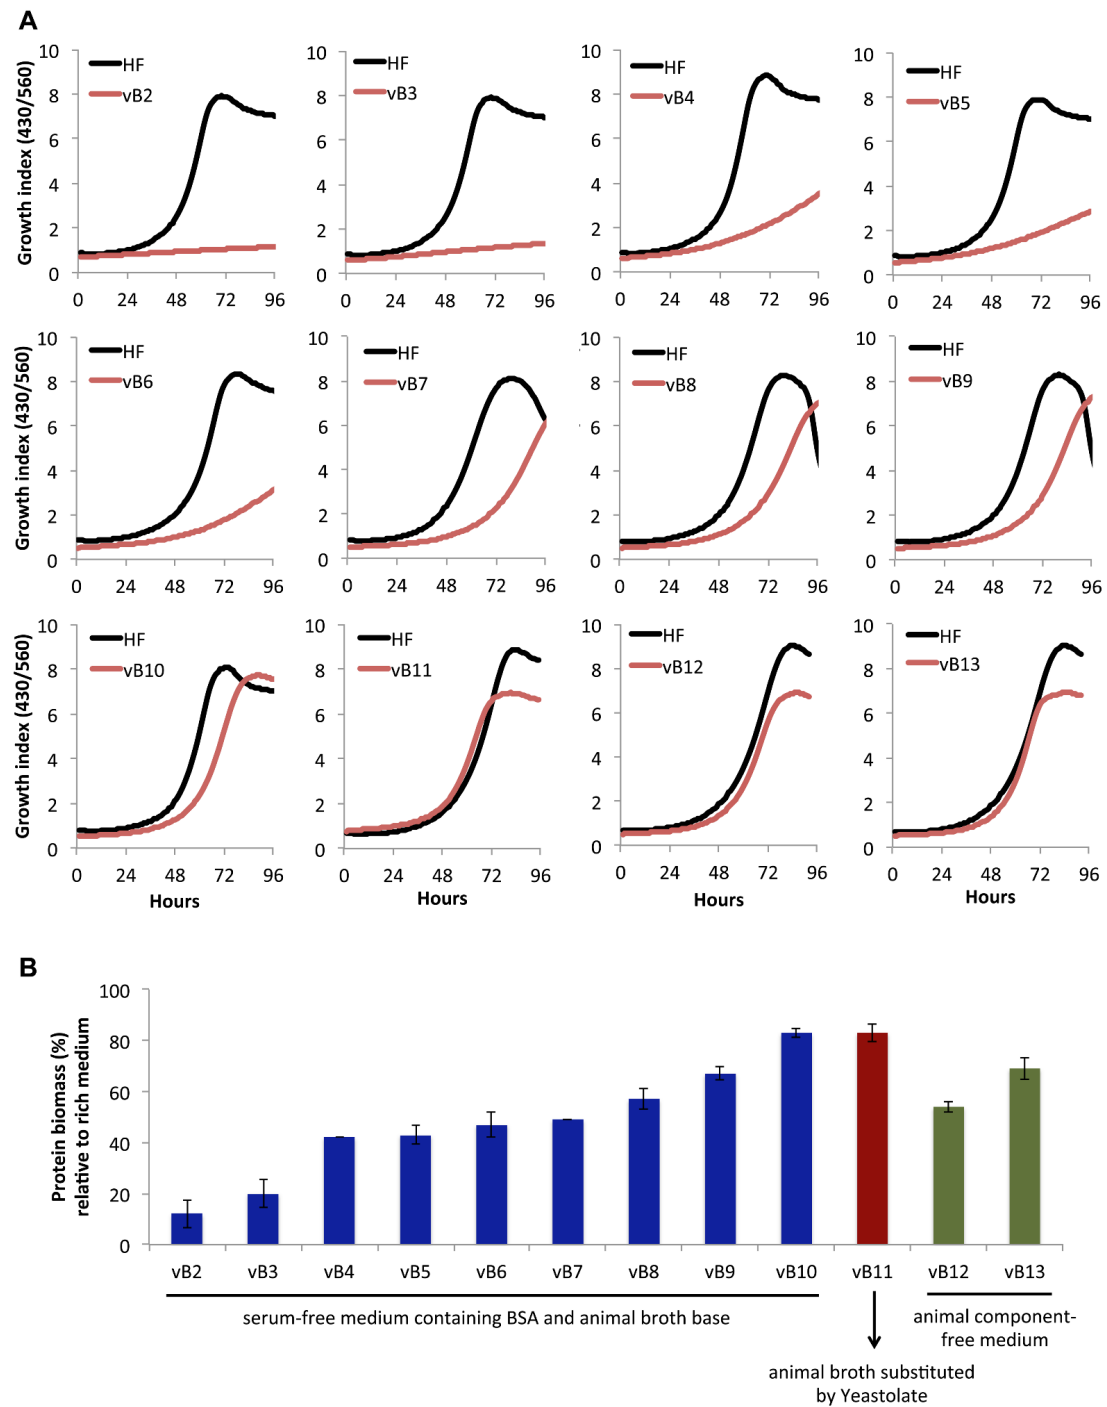

**Fig S2. Development and evolution of a serum-free medium for *M. pneumoniae* growth.**

(A) Growth curve analyses determined by the metabolic growth index comparing growth performance of different serum-free medium versions to rich medium (Hayflick containing 50mM HEPES).

**(B)** Percentage of protein biomass yield relative to rich medium (Hayflick) at the end of the growth curves shown in panel A. Data represent the mean  $\pm$  standard error of two to five biological replicates. The detailed composition of each medium is shown in Table S1.

**Figure S3**

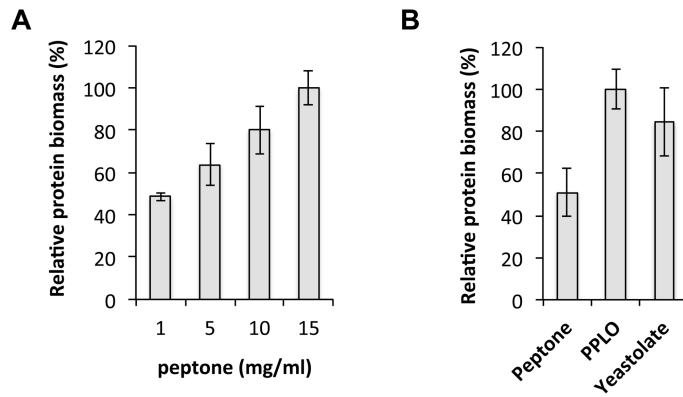

**Fig S3. Impact of protein hydrolyzates in medium performance.**

**(A)** Effect of increasing peptone concentration tested in a vB3 formulation.

**(B)** Comparison of different protein hydrolyzates in vB10 medium performance.

Protein biomass yield was assessed in a 96-well plate format culture after 96h of growth. Data represent the mean  $\pm$  standard error of at least two biological replicates.

**Figure S4**

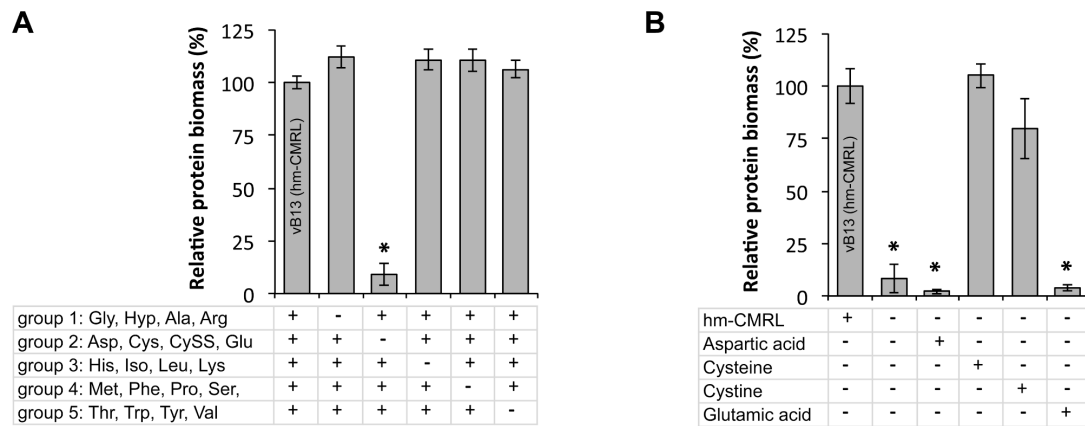

**Fig S4. Identification of essential CMRL amino acids.**

**(A)** Identification of groups of amino acids in CMRL that are required for supporting growth in vB13. Data show the relative percentage of protein biomass obtained in medium variants lacking groups of 4 amino acids present in CMRL, and compared to a vB13 medium version, in which commercial CMRL was substituted by a full home-made CMRL (hm-CMRL). Cultures were grown in a 96-well plate format and processed after 96h of culture. The (+) and (-) symbol represent the presence or absence of the indicated group of amino acids present in CMRL. Data represent the mean  $\pm$  standard error of 3 independent biological replicates. Significance relative to vB13 (hm-CMRL) formulation was assessed by two-sided independent *t*-test (\*,  $P < 0.01$ ).

**(B)** Individual assessment of medium performance after substitution of CMRL by each one of the amino acids present in the essential group 2 shown in panel A. Data represent the percentage of protein biomass relative to vB13 (hm-CMRL) as described in panel A, showing that Cysteine or its disulfide form Cystine can replace CMRL.

**Figure S5**

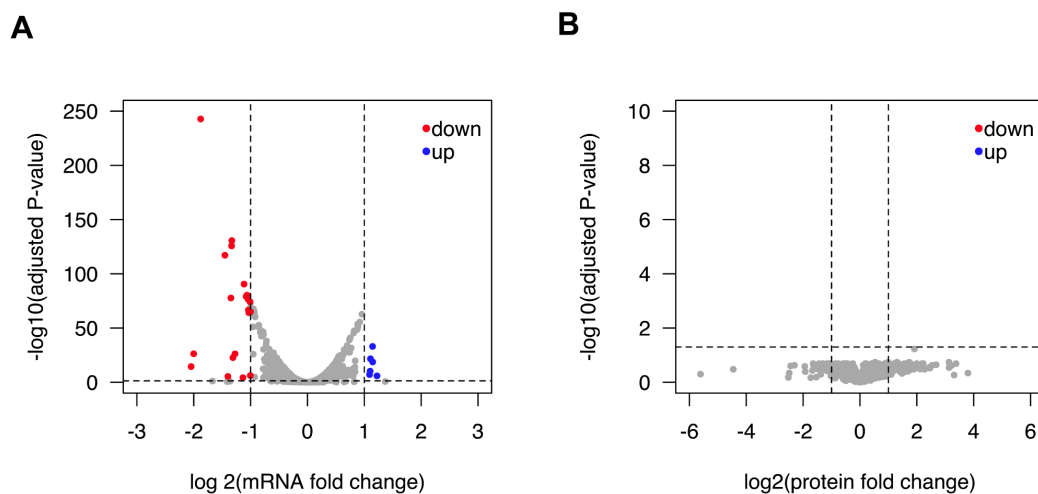

**Fig S5. Differential expression analysis of *M. pneumoniae* grown in vB13 serum-free medium and compared to rich medium.**

**(A)** Volcano plot showing transcriptional changes of *M. pneumoniae* grown in vB13 medium. Statistical significance is reported as  $-\log_{10}$  of the adjusted p-value after multiple tests correction. Significantly regulated genes (down-regulated in red, and up-regulated in blue) were defined based on a false discovery rate (FDR) of 5% (dashed horizontal line) and a minimum fold change cut-off of  $1-\log_2$  (dashed vertical lines). Differential expressed coding-genes are also reported in Table S3.

**(B)** Volcano plot showing protein changes of *M. pneumoniae* grown in vB13 medium. Statistical significance is reported as for panel A. Data represent the average of two biological replicates. See also Table S4.



**Table S2.** Detailed list of CMRL constituents present in vB13 medium.

| <b>CMRL component</b>                      | <b>µg/ml in vB13</b> |
|--------------------------------------------|----------------------|
| <b>Amino acids</b>                         |                      |
| Glycine                                    | 25                   |
| Hydroxy L-proline                          | 5                    |
| L-Alanine                                  | 12.5                 |
| L-Arginine hydrochloride                   | 35                   |
| L-Aspartic acid                            | 19.5                 |
| L-Cysteine                                 | 100                  |
| L-Cystine                                  | 10                   |
| L-Glutamic Acid                            | 37.5                 |
| L-Histidine hydrochloride-H <sub>2</sub> O | 7.4                  |
| L-Isoleucine                               | 10                   |
| L-Leucine                                  | 30                   |
| L-Lysine hydrochloride                     | 31.4                 |
| L-Methionine                               | 7.5                  |
| L-Phenylalanine                            | 12.5                 |
| L-Proline                                  | 20                   |
| L-Serine                                   | 12.5                 |
| L-Threonine                                | 15                   |
| L-Tryptophan                               | 5                    |
| L-Tyrosine                                 | 20                   |
| L-Valine                                   | 12.5                 |
| <b>Vitamins</b>                            |                      |
| Ascorbic Acid                              | 25                   |
| Biotin                                     | 0.005                |
| Cholesterol                                | 0.1                  |
| Choline chloride                           | 0.25                 |
| D-Calcium pantothenate                     | 0.005                |
| Folic Acid                                 | 0.005                |
| Niacinamide                                | 0.0125               |
| Nicotinic acid                             | 0.0125               |
| Para-Aminobenzoic Acid                     | 0.025                |
| Pyridoxal hydrochloride                    | 0.0125               |
| Pyridoxine hydrochloride                   | 0.0125               |
| Riboflavin                                 | 0.005                |
| Thiamine hydrochloride                     | 0.005                |
| i-Inositol                                 | 0.025                |
| <b>Inorganic salts</b>                     |                      |
| Calcium Chloride                           | 0.9                  |
| Magnesium Sulfate                          | 100                  |
| Potassium Chloride                         | 199                  |
| Sodium Chloride                            | 58.6                 |
| Sodium Phosphate                           | 0.5                  |
| <b>Nucleotide precursors</b>               |                      |
| 2'Deoxyadenosine                           | 5.4                  |
| 2'Deoxycytidine                            | 5.8                  |
| 2'Deoxyguanosine                           | 5.3                  |
| 5-Methyl-deoxycytidine                     | 0.1                  |
| Thymidine                                  | 5                    |
| Uridine 5'- triphosphate                   | 0.6                  |



| <b>CMRL component</b>                | <b>µg/ml in vB13</b> |
|--------------------------------------|----------------------|
| <b>Other components</b>              |                      |
| Co-carboxylase                       | 0.5                  |
| Coenzyme A                           | 1.2                  |
| D-Glucose (Dextrose)                 | 500                  |
| Diphosphopyridine nucleotide (NAD)   | 3.5                  |
| Flavin adenine dinucleotide (FAD)    | 0.5                  |
| Glutathione (reduced)                | 5                    |
| Phenol Red                           | 10                   |
| Sodium acetate-3H <sub>2</sub> O     | 25                   |
| Sodium glucuronate-H <sub>2</sub> O  | 2.1                  |
| Triphosphopyridine Nucleotide (NADP) | 0.5                  |
| Tween 80®                            | 2.5                  |

**Table S5.** Composition of different serum-free medium versions for *M. hyopneumoniae*.

| <b>Component</b>    | <b>vH1</b> | <b>vH2</b> | <b>vH3</b> | <b>vH4</b> | <b>vH5</b> | <b>vH6</b> |
|---------------------|------------|------------|------------|------------|------------|------------|
| CMRL-1066           | 0.5X       | 0.5X       | 0.5X       | 0.5X       | 0.5X       | 0.5X       |
| Glucose             | 1.5g/L     | 1.5g/L     | 1.5g/L     | 1.5g/L     | 1.5g/L     | 1.5g/L     |
| Sodium pyruvate     | 2.2g/L     | 2.2g/L     | 2.2g/L     | 2.2g/L     | 2.2g/L     | 2.2g/L     |
| Glycerol            | 0.01%      | 0.01%      | 0.01%      | 0.01%      | 0.01%      | 0.01%      |
| Glutamine           | 2mM        | 2mM        | 2mM        | 2mM        | 2mM        | 2mM        |
| Thymidine           | 40µg/ml    | 40µg/ml    | 40µg/ml    | 40µg/ml    | 40µg/ml    | 40µg/ml    |
| Adenosine           | 10µg/ml    | 10µg/ml    | 10µg/ml    | 10µg/ml    | 10µg/ml    | 10µg/ml    |
| Cytidine            | 10µg/ml    | 10µg/ml    | 10µg/ml    | 10µg/ml    | 10µg/ml    | 10µg/ml    |
| Guanosine           | 10µg/ml    | 10µg/ml    | 10µg/ml    | 10µg/ml    | 10µg/ml    | 10µg/ml    |
| Thymine             | 10µg/ml    | 10µg/ml    | 10µg/ml    | 10µg/ml    | 10µg/ml    | 10µg/ml    |
| Yeastolate          | 10mg/ml    | 10mg/ml    | 10mg/ml    | 7.5mg/ml   | 7.5mg/ml   | 7.5mg/ml   |
| Spermine            | 10µg/ml    | 10µg/ml    | 10µg/ml    | 10µg/ml    | 10µg/ml    | 10µg/ml    |
| Thioctic acid       | 0.2µg/ml   | 0.2µg/ml   | 0.2µg/ml   | 0.2µg/ml   | 0.2µg/ml   | 0.2µg/ml   |
| Pyridoxamine        | 0.5µg/ml   | 0.5µg/ml   | 0.5µg/ml   | 0.5µg/ml   | 0.5µg/ml   |            |
| Nicotinic acid      | 0.5µg/ml   | 0.5µg/ml   | 0.5µg/ml   | 0.5µg/ml   | 0.5µg/ml   |            |
| Riboflavin          | 0.5µg/ml   | 0.5µg/ml   | 0.5µg/ml   | 0.5µg/ml   | 0.5µg/ml   |            |
| Choline             | 0.5µg/ml   | 0.5µg/ml   | 0.5µg/ml   | 0.5µg/ml   | 0.5µg/ml   |            |
| non-lipidated BSA   |            | 0.5%       | 0.5%       | 0.5%       | 0.5%       | 0.5%       |
| Cholesterol         | 30µg/ml    | 30µg/ml    | 30µg/ml    | 30µg/ml    | 30µg/ml    | 30µg/ml    |
| Sphingomyelin       | 40µg/ml    | 40µg/ml    | 10µg/ml    | 10µg/ml    | 10µg/ml    | 10µg/ml    |
| Phosphatidylcholine | 40µg/ml    | 40µg/ml    | 40µg/ml    | 40µg/ml    | 40µg/ml    | 40µg/ml    |
| PG <sup>(a)</sup>   |            |            |            |            | 10µg/ml    | 10µg/ml    |
| DPPC <sup>(b)</sup> |            |            |            |            | 20µg/ml    | 20µg/ml    |
| Ampicillin          | 100µg/ml   | 100µg/ml   | 100µg/ml   | 100µg/ml   | 100µg/ml   | 100µg/ml   |
| Phenol red pH 7     | 0.0035%    | 0.0035%    | 0.0035%    | 0.0035%    | 0.0035%    | 0.0035%    |
| NaOH (pH7.7)        |            |            |            |            |            |            |

<sup>(a)</sup> PG (L- $\alpha$ -Phosphatidyl-DL-glycerol)

<sup>(b)</sup> DPPC (1,2-Dipalmitoyl-sn-glycero-3-phosphocholine)
